# Supplementary material for: Enzyme Mimetic Activity of ZnO-Pd Nanosheets Synthesized via a Green Route
Source: MDPI journal article supplement (doi:10.3390/molecules25112585), 2020-06-02
Supplement: s1 [file s1]

Article

# Enzyme mimetic activity of ZnO-Pd nanosheets synthesized via green route

Ravi Mani Tripathi<sup>1,2</sup>, Dohee Ahn<sup>1</sup>, Yeong Mok Kim<sup>1</sup>, Sang J. Chung<sup>1\*</sup>

<sup>1</sup> School of Pharmacy, Sungkyunkwan University, 2066 Seoburo, Jangan-gu, Suwon, Gyeonggido 16419, Republic of Korea

<sup>2</sup> Amity Institute of Nanotechnology, Amity University Uttar Pradesh, Sector 125, Noida 201303, India

\*Correspondence: [sjchung@skku.edu](mailto:sjchung@skku.edu); Tel.: +82-31-290-7703; Fax +82-31-292-8800

Received: date; Accepted: date; Published: date

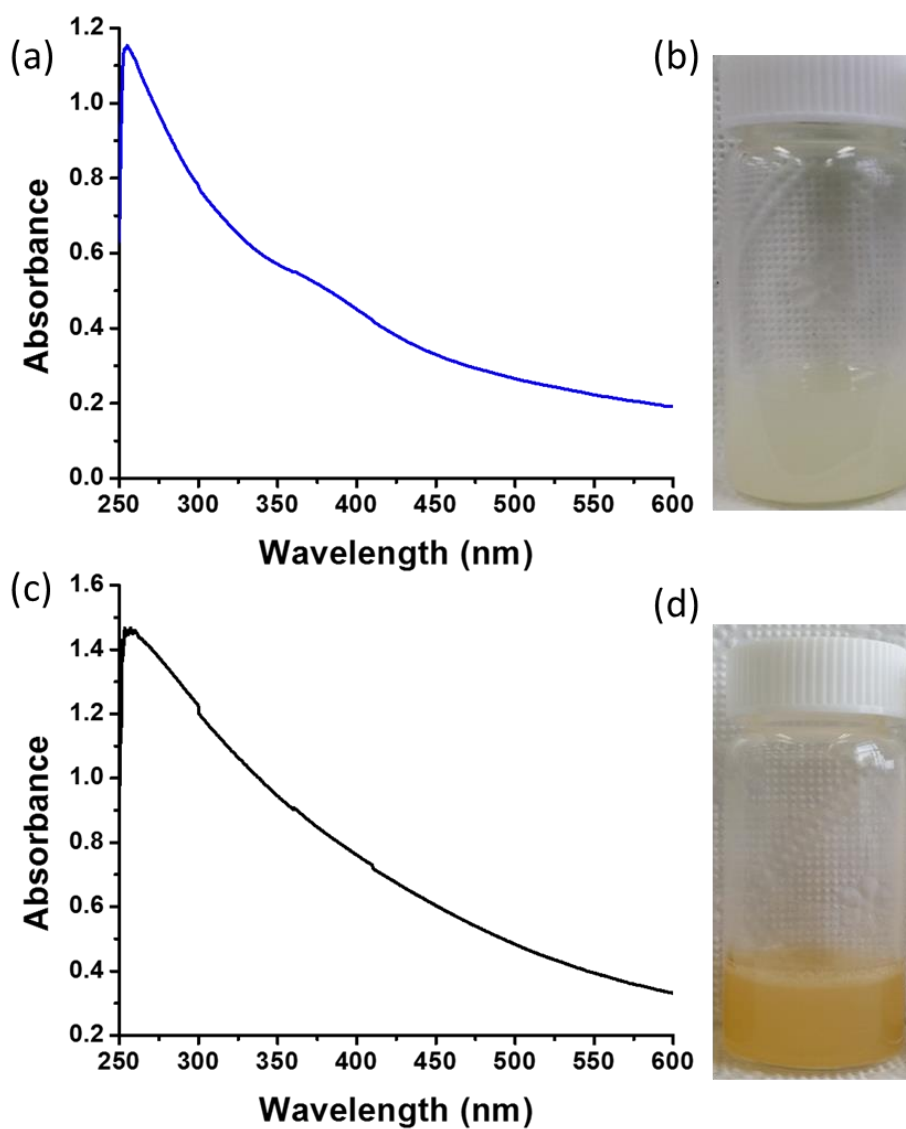

**Figure S1.** Green synthesis of ZnO nanosheets and ZnO-Pd nanosheets.

**(a)** Ultraviolet–visible spectra of biosynthesized ZnO nanosheets. **(b)** White-yellow-colored dispersion of as-synthesized ZnO nanosheets. **(c)** Ultraviolet–visible spectra of biosynthesized ZnO-Pd nanosheets. **(d)** Light yellow-brown-colored dispersion of as-synthesized ZnO-Pd nanosheets.

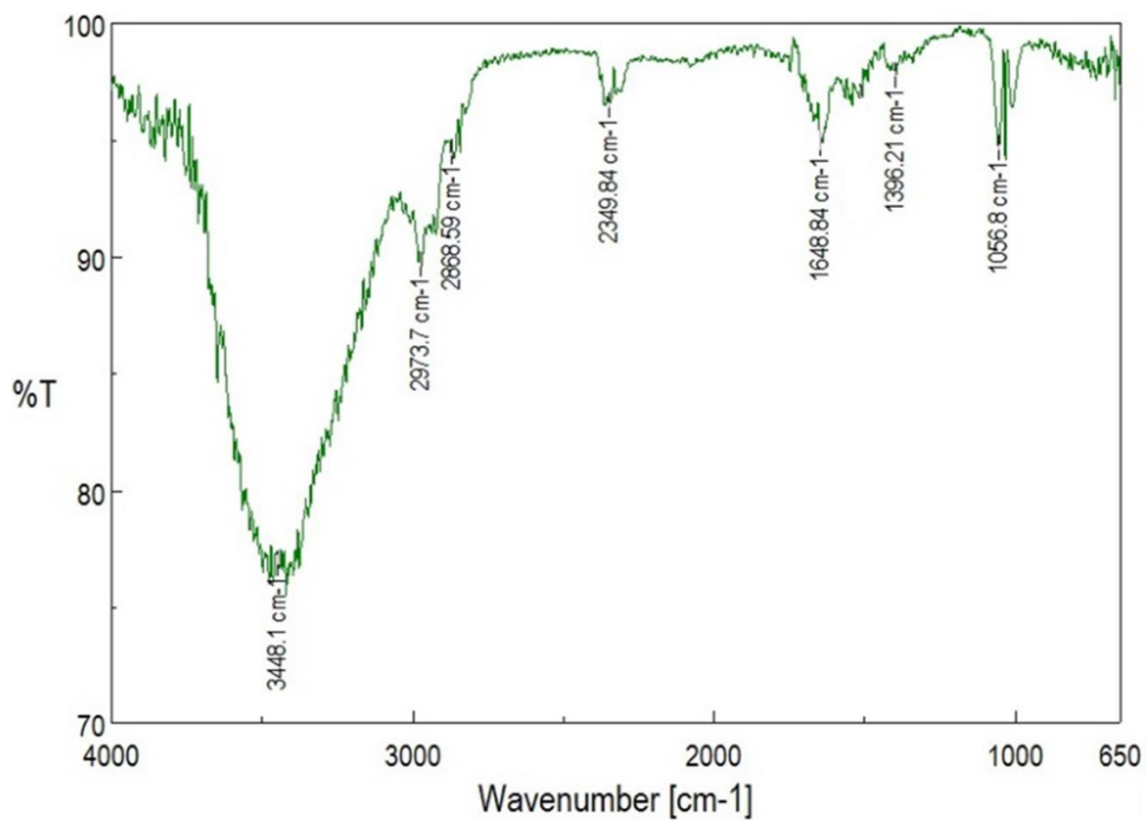

**Figure S2.** FTIR spectrum of biosynthesized ZnO-Pd nanosheets.

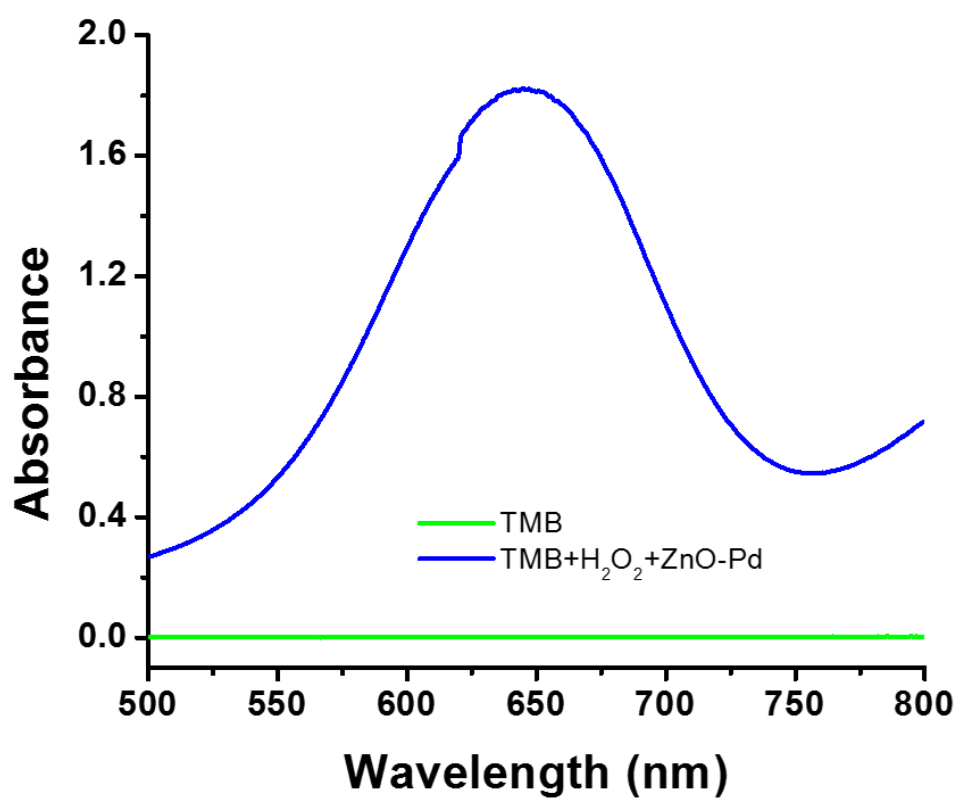

**Figure S3.** Absorbance spectra of TMB and oxidized TMB after 20 min of incubation at room temperature.

**Table S1.** The amount of Pd and Zn in nanosheets was determined by ICP-MS.

| Element | Pd   | Zn   |
|---------|------|------|
| % (w/w) | 0.45 | 11.6 |
